# Supplementary material
Source: publisher figshare collection journal article supplement (https://frontiersin.figshare.com/ndownloader/files/11277401)

## Supplementary Figure 1: Domain Descriptions

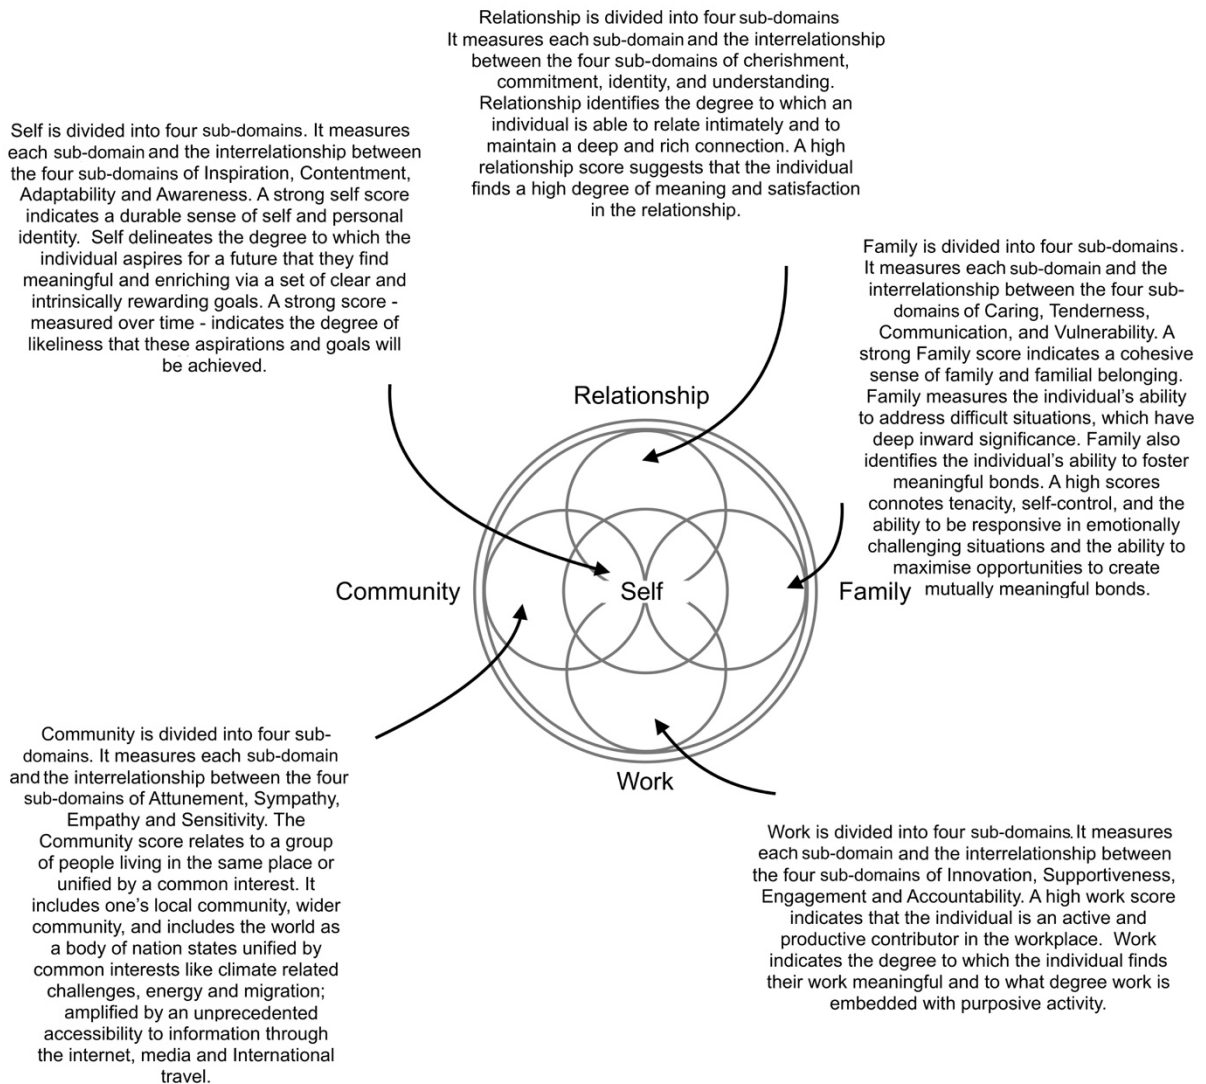

Supplement: Supplementary file 1 [file 11277401]
